# Supplementary material for: Reproductive outcomes of different management strategies after hysteroscopic resection of the uterine septum with endometrial polyps: a retrospective study
Source: PeerJ. 2026 Jan 28;14:e20669. doi: 10.7717/peerj.20669 (PMC12860278; doi:10.7717/peerj.20669)
Supplement: Supplemental Information 1 — This is the primary dataset converted from SPSS into a universal Excel format. The first row of the spreadsheet contains the variable names with their value codes in parentheses. [file peerj-14-20669-s001.xlsx]

## Sheet: database
Postoperative Management (1 = "artificial cycle";2 = "short-acting contraceptive";3 = "no hormonal treatment")	Number	BMI	Age	Previous number of induced abortions	Types of fertility problems(1 = "infertility";2 = "adverse pregnancy")	Types of uterine septum(1 = "complete";2 = "incomplete")	Types of endometrial polyps(1 = "single";2 = "multiple")	Live birth(0 = "no";1 = "yes")	The months to pregnancy resulting in a live birth	Clinical pregnancy (1 = "not pregnant";2 = "clinical pregnancy")	Pregnancy loss(0 = "no";1 = "yes")	Preterm birth(0 = "no";1 = "yes")	Recurrence of endometrial polyps (0 = "no";1 = "recurrence")	Intrauterine adhesion(0 = "no";1 = "intrauterine adhesion")	Placental abruption(0 = "no";1 = "yes")	Placenta accreta(0 = "no";1 = "yes")	Placenta previa(0 = "no";1 = "yes")
1	1	28.8	26	0	1	1	2	0	12	1	0	0	0	0	0	0	0
1	2	23.9	27	0	1	2	2	0	12	1	0	0	0	0	0	0	0
1	3	24.8	30	0	1	2	2	0	12	1	0	0	0	0	0	0	0
1	4	21.5	29	1	2	1	2	1	6	2	0	0	1	0	0	0	0
1	5	19.4	29	0	1	2	2	0	12	1	0	0	0	0	0	0	1
1	6	20.9	30	0	1	1	2	1	5	2	0	1	0	0	1	0	1
1	7	22.6	31	0	1	2	2	1	7	2	0	0	0	0	0	0	0
1	8	21.1	30	1	2	2	2	0	12	1	0	0	0	0	0	0	0
1	9	26.7	24	2	2	1	2	1	4	2	0	0	0	0	0	0	0
1	10	26	31	0	1	1	2	1	4	2	0	0	0	0	0	0	0
1	11	31.2	28	0	1	1	2	1	11	2	0	0	1	0	0	0	0
1	12	27.5	23	0	1	1	2	1	4	2	0	0	0	0	0	0	0
1	13	22.6	29	1	2	2	2	1	9	2	0	0	0	0	0	0	0
1	14	20.1	32	0	1	1	2	1	10	2	0	0	0	0	0	0	0
1	15	20.8	25	0	2	1	2	1	4	2	0	0	0	0	0	0	0
1	16	21.3	27	0	1	2	2	0	12	2	1	0	0	0	0	0	0
1	17	24.9	33	0	2	1	2	0	12	1	0	0	0	0	0	0	0
1	18	26.9	34	0	1	2	2	0	12	2	1	0	0	0	0	0	0
1	19	22.4	28	0	1	2	2	1	12	2	0	0	0	0	0	0	0
1	20	28.7	30	0	2	2	2	0	12	1	0	0	0	0	0	0	0
1	21	21.8	29	0	1	1	2	1	9	2	0	0	0	0	0	0	0
1	22	31.6	23	0	1	2	2	1	8	2	0	0	0	0	0	0	0
1	23	20.6	26	0	1	2	2	0	12	2	1	0	0	0	0	0	0
1	24	22.1	28	0	2	1	2	0	12	1	0	0	0	0	0	0	0
1	25	24.2	27	0	2	2	1	1	7	2	0	0	0	0	0	0	0
1	26	19.5	29	0	1	2	2	0	12	1	0	0	0	0	0	0	0
1	27	24.8	35	5	2	2	2	0	12	2	1	0	0	0	0	0	0
1	28	23.8	32	0	2	1	2	0	12	1	0	0	0	0	0	0	0
1	29	19.6	28	0	1	1	2	0	12	1	0	0	0	0	0	0	0
1	30	20.1	33	0	1	2	2	0	12	1	0	0	1	0	0	0	0
1	31	25.4	23	0	2	2	2	1	5	2	0	0	0	0	0	0	0
1	32	29.3	25	0	1	1	2	0	12	1	0	0	0	0	0	0	0
1	33	19.6	27	0	1	2	2	1	9	2	0	0	0	0	0	0	0
1	34	28.3	33	1	2	2	2	0	12	1	0	0	1	0	0	0	0
1	35	23.2	22	0	1	1	2	1	4	2	0	0	0	0	0	0	0
1	36	24	27	1	2	2	2	0	12	1	0	0	0	0	0	0	0
1	37	26.3	27	2	2	2	2	0	12	1	0	0	0	0	0	0	0
1	38	25.4	26	1	2	1	2	1	4	2	0	0	0	0	1	0	0
1	39	21.3	34	0	2	2	2	0	12	1	0	0	0	0	0	0	0
1	40	21.1	28	0	1	1	1	1	6	2	0	0	0	0	0	0	0
1	41	18.9	32	0	1	2	2	1	6	2	0	0	0	0	0	0	0
1	42	27.7	36	1	2	2	2	0	12	1	0	0	0	1	0	0	0
1	43	24.4	35	0	2	1	2	0	12	1	0	0	0	0	0	0	0
1	44	22	27	1	2	1	2	1	8	2	0	0	0	0	0	0	0
1	45	19.8	28	0	1	1	2	0	12	1	0	0	0	0	0	0	0
1	46	23.4	28	0	2	2	2	1	4	2	0	0	0	0	0	0	0
1	47	30.3	31	3	2	2	2	0	12	1	0	0	0	1	0	0	0
1	48	19.5	29	2	2	2	2	0	12	1	0	0	0	0	0	0	0
1	49	26.2	30	1	2	2	2	1	4	2	0	0	0	0	0	0	0
1	50	26.8	29	0	1	1	1	1	4	2	0	0	0	0	0	0	0
1	51	27.7	24	0	1	2	2	1	4	2	0	0	0	0	0	0	0
1	52	22.3	38	0	1	1	2	1	6	2	0	0	0	0	0	1	1
1	53	25.7	28	0	2	2	2	1	5	2	0	0	0	0	0	0	0
1	54	21.6	18	1	2	2	2	1	7	2	0	0	0	0	0	0	0
1	55	20	34	0	1	2	2	0	12	1	0	0	1	0	0	0	0
1	56	25	28	1	2	2	2	0	12	1	0	0	0	0	0	0	0
1	57	29.6	31	1	2	2	1	0	12	2	1	0	0	0	0	0	0
1	58	19.9	29	0	1	2	2	1	5	2	0	0	0	0	0	0	0
1	59	21.5	30	2	2	2	2	1	10	2	0	0	0	0	0	0	0
1	60	23.3	29	0	2	2	2	1	6	2	0	1	0	0	0	0	0
1	61	19.8	22	1	2	1	2	0	12	1	0	0	0	1	0	0	0
1	62	29.8	27	0	1	1	2	0	12	1	0	0	0	0	0	0	0
1	63	20.7	23	1	2	2	2	1	4	2	0	0	0	0	0	0	0
1	64	21	26	1	2	2	1	0	12	1	0	0	0	0	0	0	0
1	65	24.9	35	3	2	2	1	0	12	1	0	0	0	0	0	0	0
1	66	27.9	35	0	2	2	2	0	12	1	0	0	0	1	0	0	0
1	67	23.1	30	1	2	2	2	0	12	1	0	0	0	0	0	0	0
1	68	20.7	22	0	2	1	2	0	12	1	0	0	1	0	0	0	0
1	69	19.6	27	0	1	1	2	0	12	1	0	0	0	0	0	0	0
1	70	22.6	32	0	1	2	2	0	12	1	0	0	0	0	0	0	0
1	71	21.1	23	1	2	1	1	0	12	1	0	0	0	0	0	0	0
1	72	18.3	31	0	2	2	2	1	4	2	0	0	0	0	0	0	0
1	73	18.8	29	0	1	2	2	1	4	2	0	0	0	0	0	0	0
1	74	23.6	26	0	1	2	2	0	12	1	0	0	0	0	0	0	0
1	75	20.4	27	0	1	2	2	0	12	1	0	0	0	0	0	0	0
1	76	21.5	27	0	1	2	2	0	12	1	0	0	0	0	0	0	0
1	77	25.4	24	0	1	1	2	0	12	1	0	0	0	0	0	0	0
1	78	20.3	30	1	2	2	2	0	12	1	0	0	0	1	0	0	0
1	79	24.1	27	0	1	1	2	0	12	1	0	0	0	0	0	0	0
1	80	25.4	26	0	1	2	2	0	12	1	0	0	0	0	0	0	0
1	81	23.2	26	0	2	2	2	1	5	2	0	0	0	0	0	0	0
1	82	19.1	33	0	1	1	2	0	12	1	0	0	0	0	0	0	0
1	83	20.4	23	1	2	2	2	1	4	2	0	0	0	0	0	0	0
1	84	21.9	31	2	2	2	2	0	12	2	1	0	0	0	0	0	0
1	85	21.8	39	2	2	2	1	0	12	1	0	0	0	1	0	0	0
1	86	28.3	33	0	2	2	2	0	12	1	0	0	1	0	0	0	0
1	87	29.3	35	0	1	1	2	0	12	1	0	0	0	0	0	0	0
1	88	19.4	23	1	2	1	2	0	12	1	0	0	0	0	0	0	0
1	89	19.6	27	0	1	2	2	1	4	2	0	0	0	0	0	0	0
1	90	30	31	0	1	2	2	0	12	1	0	0	0	0	0	0	0
1	91	21.4	26	0	2	1	2	0	12	2	1	0	0	0	0	0	0
1	92	23.8	25	1	2	2	1	0	12	1	0	0	0	0	0	0	0
2	93	19.3	30	0	1	2	2	0	12	1	0	0	0	0	0	0	0
2	94	31.6	27	0	1	2	2	1	6	2	0	0	0	0	0	0	0
2	95	31.2	36	1	2	2	2	0	12	2	1	0	0	0	0	0	0
2	96	21.5	32	0	2	2	2	0	12	1	0	0	0	0	0	0	0
2	97	20.5	24	0	1	1	2	1	12	2	0	0	0	0	0	0	0
2	98	27.2	31	0	1	2	2	1	6	2	0	0	0	0	0	0	0
2	99	25.4	29	1	2	2	2	0	12	1	0	0	0	0	0	0	0
2	100	22.5	35	2	2	2	1	0	12	1	0	0	0	0	0	0	0
2	101	25	34	3	2	2	2	0	12	2	1	0	0	0	0	0	0
2	102	24.9	33	0	2	2	2	0	12	1	0	0	0	0	0	0	0
2	103	26.6	27	0	2	1	2	0	12	1	0	0	0	0	0	0	0
2	104	23	29	0	2	2	2	0	12	1	0	0	0	0	0	0	0
2	105	21.2	25	1	2	1	2	0	12	1	0	0	0	0	0	0	0
2	106	17.3	27	0	1	1	2	0	12	1	0	0	0	0	0	0	0
2	107	18	25	0	1	1	2	0	12	1	0	0	0	0	0	0	0
2	108	25.3	32	0	1	2	2	0	12	1	0	0	0	0	0	0	0
2	109	28	24	0	1	2	1	0	12	1	0	0	0	0	0	0	0
2	110	22.3	30	0	1	1	1	0	12	1	0	0	0	0	0	0	0
2	111	27.3	29	2	2	2	2	1	10	2	0	0	0	1	0	0	0
2	112	33.1	31	0	2	1	1	0	12	1	0	0	0	0	0	0	0
2	113	25	27	0	2	2	1	1	8	2	0	0	0	0	0	0	0
2	114	19.5	28	0	1	2	2	1	5	2	0	0	0	0	0	0	0
2	115	21	27	1	2	2	2	0	12	1	0	0	0	0	0	0	0
2	116	24.2	21	0	1	2	2	0	12	2	1	0	0	0	0	0	0
2	117	27.2	34	1	2	1	2	0	12	1	0	0	1	0	0	0	0
2	118	19.3	37	0	1	2	1	0	12	1	0	0	0	0	0	0	0
2	119	21.9	32	0	1	2	2	0	12	1	0	0	0	0	0	0	0
2	120	20	29	1	2	2	2	1	4	2	0	0	0	0	0	0	0
2	121	20.8	37	2	2	2	2	1	9	2	0	0	0	0	0	0	0
2	122	28.2	27	1	2	2	2	0	12	1	0	0	0	0	0	0	0
2	123	21	36	1	2	2	2	1	4	2	0	0	0	0	0	0	0
2	124	29.3	33	1	2	2	2	0	12	1	0	0	0	0	0	0	0
2	125	26.7	35	2	2	2	2	1	10	2	0	0	0	1	0	0	0
2	126	30.7	32	1	2	1	1	0	12	1	0	0	0	0	0	0	0
2	127	30	27	2	2	2	1	1	8	1	0	0	0	0	0	0	0
2	128	23.8	25	1	2	2	2	1	5	2	0	0	0	0	0	0	0
2	129	24	27	1	2	1	2	0	12	1	0	0	0	1	0	0	0
2	130	27.5	30	0	1	2	2	0	12	2	1	0	0	0	0	0	0
2	131	19.8	34	1	2	1	1	0	12	1	0	0	0	0	0	0	0
2	132	25.9	33	0	1	2	1	0	12	1	0	0	0	0	0	0	0
2	133	22.7	28	1	2	2	1	0	12	1	0	0	0	0	0	0	0
2	134	29	31	0	2	1	1	0	12	1	0	0	0	0	0	0	0
2	135	27.5	26	1	2	2	1	1	4	2	0	0	0	0	0	0	0
2	136	26.2	24	0	1	1	2	1	5	2	0	0	0	0	0	0	0
2	137	26	30	1	2	2	2	1	4	2	0	1	0	0	0	0	0
2	138	22	26	3	2	2	2	0	12	1	0	0	0	0	0	0	0
2	139	29.4	29	1	2	2	2	0	12	1	0	0	0	0	0	0	0
2	140	21.7	22	0	1	1	2	1	6	2	0	0	0	0	0	0	0
2	141	24.9	29	0	1	1	2	0	12	1	0	0	0	1	0	0	0
2	142	23.8	22	2	2	2	2	0	12	2	1	0	0	0	0	0	0
2	143	23.5	37	1	2	2	2	1	8	2	0	1	0	0	0	0	1
2	144	30.9	30	1	2	2	1	1	10	2	0	0	0	0	0	0	0
3	145	24.2	33	1	2	2	2	0	12	1	0	0	1	0	0	0	0
3	146	21.1	28	0	2	2	2	1	8	2	0	0	0	0	0	0	0
3	147	19.8	27	0	2	2	2	1	12	2	0	0	0	0	0	0	0
3	148	27.6	31	0	2	2	2	0	12	1	0	0	0	0	0	0	0
3	149	22.7	27	0	2	2	2	0	12	1	0	0	0	0	0	0	0
3	150	26.8	26	0	1	1	2	1	4	2	0	0	0	0	0	0	0
3	151	20.8	31	0	1	1	2	0	12	2	1	0	0	0	0	0	0
3	152	19.3	27	0	2	2	2	0	12	2	1	0	0	0	0	0	0
3	153	22	28	1	1	1	2	0	12	1	0	0	1	0	0	0	0
3	154	24	35	1	1	1	2	0	12	1	0	0	0	0	0	0	0
3	155	19.1	31	0	1	1	2	0	12	1	0	0	0	0	0	0	0
3	156	23.9	27	0	1	1	2	0	12	1	0	0	1	0	0	0	0
3	157	26.9	34	4	2	2	2	0	12	2	1	0	0	0	0	0	0
3	158	25	31	0	2	2	2	1	10	2	0	0	0	0	0	0	0
3	159	22.4	28	2	2	2	2	1	8	2	0	0	0	0	0	0	0
3	160	34.1	21	2	1	1	2	0	12	1	0	0	0	0	0	0	0
3	161	22.2	25	1	2	2	2	0	12	1	0	0	0	0	0	0	0
3	162	27.1	28	1	1	1	2	0	12	1	0	0	0	0	0	0	0
3	163	22.7	37	0	2	2	1	0	12	1	0	0	0	0	0	0	0
3	164	19.1	31	0	2	2	2	0	12	1	0	0	0	0	0	0	0
3	165	20.2	26	1	2	2	1	0	12	1	0	0	0	0	0	0	0
3	166	26.2	28	0	2	2	2	1	12	2	0	0	1	0	0	0	0
3	167	26	24	0	2	2	2	0	12	1	0	0	0	0	0	0	0
3	168	21	30	0	2	2	2	0	12	1	0	0	1	0	0	0	0
3	169	29.4	31	3	2	2	2	0	12	1	0	0	0	1	0	0	0
3	170	21.7	22	1	1	1	2	1	4	2	0	0	0	0	0	0	0
3	171	19.5	27	0	1	1	2	0	12	1	0	0	0	0	0	0	0
3	172	27.3	23	2	2	2	2	0	12	1	0	0	0	1	0	0	0
3	173	23.5	31	1	2	2	2	0	12	1	0	0	0	0	0	0	0
3	174	24.9	25	1	2	2	2	0	12	1	0	0	0	0	0	0	0
3	175	19.9	22	0	2	2	1	0	12	1	0	0	0	0	0	0	0
3	176	23.8	28	2	2	2	2	1	8	2	0	0	0	0	0	0	0
3	177	21.9	29	0	1	1	2	0	12	1	0	0	0	0	0	0	0
3	178	23	25	1	2	2	2	1	7	2	0	0	0	0	0	0	0
3	179	18.4	25	0	2	2	1	0	12	1	0	0	0	0	0	0	0
3	180	21.9	22	0	2	2	1	1	6	2	0	0	0	0	0	0	0
3	181	22.3	27	1	1	1	1	1	4	2	0	0	0	0	0	1	1
3	182	19.1	37	0	2	2	2	0	12	1	0	0	0	0	0	0	0
3	183	27.9	32	1	1	1	1	0	12	2	1	0	0	0	0	0	0
3	184	26.3	26	0	2	2	2	0	12	1	0	0	0	0	0	0	0
3	185	21.5	27	0	2	2	2	0	12	1	0	0	0	0	0	0	0
3	186	24	20	0	2	2	2	1	4	2	0	0	0	0	0	0	0
3	187	23	30	0	2	2	2	1	5	2	0	0	0	0	0	0	0
3	188	26.2	28	1	2	2	2	1	4	2	0	1	0	0	0	0	0
3	189	25.7	23	0	2	2	1	0	12	1	0	0	0	0	0	0	0
